# Supplementary material
Source: PubMed Central journal article supplement (PMC11025390)
Supplement: NIHMS1985720-supplement-Supplementary_Material.pdf [file NIHMS1985720-supplement-Supplementary_Material.pdf]

1 **SUPPORTING INFORMATION:**

2  
3 **Ionizable lipid nanoparticles for therapeutic base editing of congenital brain disease**

4  
5 Rohan Palanki<sup>\*\*1,2</sup>, Sourav K Bose<sup>\*\*2</sup>, Apeksha Dave<sup>2</sup>, Brandon M. White<sup>2</sup>, Cara Berkowitz<sup>2</sup>,  
6 Valerie Luks<sup>2</sup>, Fazeela Yaqoob<sup>9</sup>, Emily Han<sup>1</sup>, Kelsey L Swingle<sup>1</sup>, Pallavi Menon<sup>2</sup>, Emily  
7 Hodgson<sup>2</sup>, Arijit Biswas<sup>10</sup>, Margaret M Billingsley<sup>1</sup>, Li Li<sup>6</sup>, Fan Yiping<sup>10</sup>, Marco Carpenter<sup>2</sup>,  
8 Alexandra Trokhan<sup>2</sup>, Julie Yeo<sup>10</sup>, Nuryanti Johana<sup>10</sup>, Tan Yi Wan<sup>10</sup>, Mohamad-Gabriel Alameh<sup>3</sup>,  
9 Frederick Chris Bennett<sup>9</sup>, Phillip B. Storm<sup>12</sup>, Rajan Jain<sup>3,6</sup>, Jerry Chan<sup>10,11</sup>, Drew Weissman<sup>3</sup>,  
10 Michael J. Mitchell<sup>\*1,4,5,6,7</sup>, William H. Peranteau<sup>\*2,8</sup>

11 **\*\*Equal contribution**

12 **\*Co-corresponding authors: (M.J.M.) [mjmitch@seas.upenn.edu](mailto:mjmitch@seas.upenn.edu); (W.H.P.) [peranteauw@chop.edu](mailto:peranteauw@chop.edu)**

13  
14 <sup>1</sup>Department of Bioengineering, University of Pennsylvania, Philadelphia, PA 19104, USA.

15 <sup>2</sup>Center for Fetal Research, Children's Hospital of Philadelphia, Philadelphia, PA 19104, USA.

16 <sup>3</sup>Department of Medicine, Perelman School of Medicine, University of Pennsylvania,  
17 Philadelphia, PA 19104, USA.

18 <sup>4</sup>Abramson Cancer Center, Perelman School of Medicine, University of Pennsylvania,  
19 Philadelphia, PA 19104, USA.

20 <sup>5</sup>Institute for Immunology, Perelman School of Medicine, University of Pennsylvania,  
21 Philadelphia, PA 19104, USA.

22 <sup>6</sup>Cardiovascular Institute, Perelman School of Medicine, University of Pennsylvania, Philadelphia,  
23 PA 19104, USA.

24 <sup>7</sup>Institute for Regenerative Medicine, Perelman School of Medicine, Philadelphia, PA 19104,  
25 USA.

26 <sup>8</sup>Division of General, Thoracic, and Fetal Surgery, Children's Hospital of Philadelphia, PA, USA.

27 <sup>9</sup>Department of Psychiatry, Perelman School of Medicine, University of Pennsylvania,  
28 Philadelphia, PA 19104, USA.

29 <sup>10</sup>Duke-NUS Graduate Medical School, Singapore, 169547, SG.

30 <sup>11</sup>Department of Reproductive Medicine, KK Women's and Children's Hospital, Singapore,  
31 229899, SG.

32 <sup>12</sup>Division of Neurosurgery, Children's Hospital of Philadelphia, PA 19104, USA.

|    | Size (nm) | PDI   | Encapsulation Efficiency (%) | pK <sub>a</sub> | Zeta Potential (mV) |
|----|-----------|-------|------------------------------|-----------------|---------------------|
| A1 | 128       | 0.094 | 84.2                         | 6.81            | 8.43                |
| A2 | 68        | 0.103 | 79.9                         | 5.57            | 2.99                |
| A3 | 82        | 0.113 | 83.5                         | 5.97            | 4.55                |
| A4 | 102       | 0.075 | 97.0                         | 6.76            | 11.1                |
| B1 | 83        | 0.109 | 93.4                         | 7.14            | 3.12                |
| B2 | 107       | 0.146 | 85.1                         | 5.79            | 5.89                |
| B3 | 80        | 0.154 | 88.1                         | 5.94            | 10.4                |
| B4 | 130       | 0.064 | 90.2                         | 6.60            | 15.6                |
| C1 | 71        | 0.116 | 96.6                         | 6.87            | 2.57                |
| C2 | 107       | 0.138 | 91.1                         | 5.83            | 7.89                |
| C3 | 88        | 0.043 | 92.0                         | 5.05            | 9.78                |
| C4 | 95        | 0.087 | 97.6                         | 6.01            | 2.43                |

33  
34 **Table S1:** Physicochemical properties of LNP library including size, polydispersity index (PDI),  
35 encapsulation efficiency, pK<sub>a</sub>, and zeta potential.  
36  
37  
38  
39  
40  
41  
42

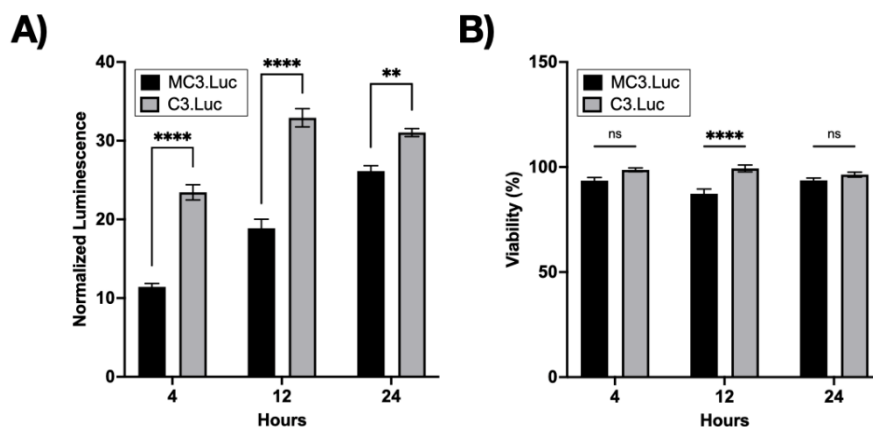

43  
44 **Fig. S1 |** Luciferase expression (A) and viability (B) of Neuro-2A cells after treatment with either  
45 C3 or MC3 LNP (100 ng of mRNA) encapsulating luciferase mRNA. \*\* p < 0.01, \*\*\*\* p < 0.0001  
46 by two-way analysis of variance (ANOVA) with post-hoc Šídák's multiple comparisons test.

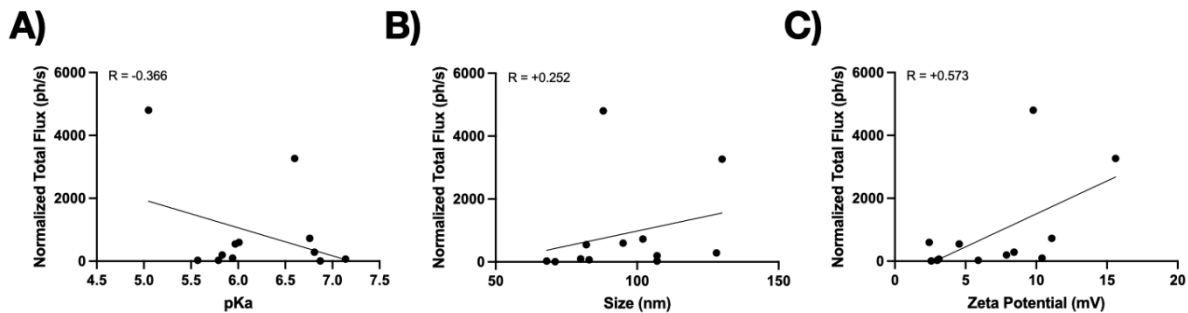

47  
 48 **Fig. S2** | Relationship between LNP library physiochemical properties – including (A) pK<sub>a</sub>, (B)  
 49 size, and (C) zeta potential – and LNP transfection efficacy *in vivo* after ICV injection to E18  
 50 Balb/c fetuses as measured by quantification of luciferase signal 4 hours after administration via  
 51 IVIS imaging. Correlation coefficient (R) of linear regression analysis is reported in the top left  
 52 corner of each individual graph.

53  
 54  
 55

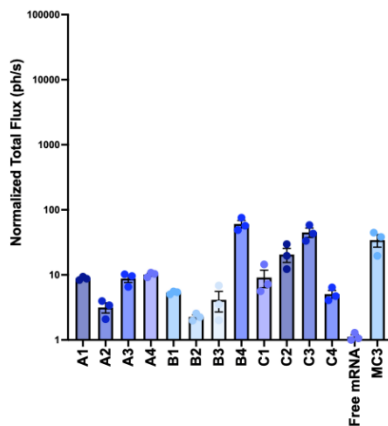

56  
 57 **Fig. S3** | Quantification of *luciferase* signal via IVIS imaging from harvested livers of E18 BALB/c  
 58 fetuses 4 hours after ICV injection (1 mg/kg) with each LNP in the screening library, free mRNA,  
 59 or MC3 LNP following normalization to background autofluorescence.

60  
 61  
 62

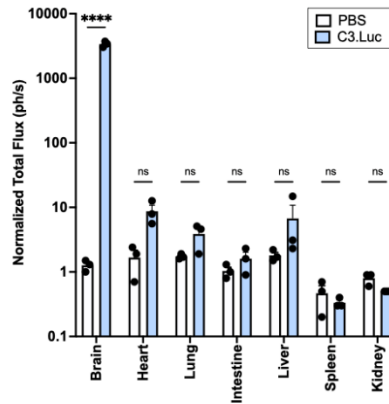

63  
 64 **Fig. S4** | Quantification of *luciferase* signal via IVIS imaging from harvested organs (brain, heart,  
 65 lung, intestine, liver, spleen, kidney) of E18 BALB/c fetuses 4 hours after ICV injection (1 mg/kg)  
 66 with C3 LNP or PBS following normalization to background autofluorescence. \*\*\*\* p < 0.0001  
 67 by two-way analysis of variance (ANOVA) with post-hoc Šídák's multiple comparisons test.

68  
 69  
 70  
 71  
 72  
 73  
 74  
 75  
 76

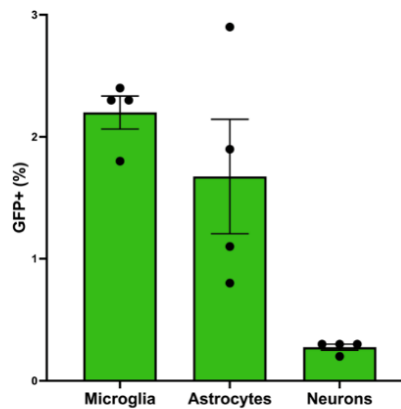

77  
 78 **Fig. S5** | Percentage of green fluorescent protein (GFP) positive cells among sub-populations of  
 79 microglia (CD11b<sup>+</sup>/CD45<sup>lo</sup>), astrocytes (GFAP<sup>+</sup>/CD45<sup>-</sup>), and neurons (NFM<sup>+</sup>/CD45<sup>-</sup>) in the brain  
 80 after ICV injection (1 mg/kg) of C3 LNPs encapsulating Cre mRNA to P0 R26<sup>mTmG</sup> neonates.

81

| LEVELS | FACTORS (MOLAR RATIO %) |      |             |
|--------|-------------------------|------|-------------|
|        | Ionizable Lipid         | DOPE | Cholesterol |
| 1      | 29                      | 13   | 40          |
| 2      | 35                      | 16   | 46.5        |
| 3      | 41                      | 19   | 53          |

82  
83 **Fig. S6** | Orthogonal DOE array displaying the range of excipient molar ratios used in C3.1-C3.9  
84 LNP formulation.

85  
86  
87  
88

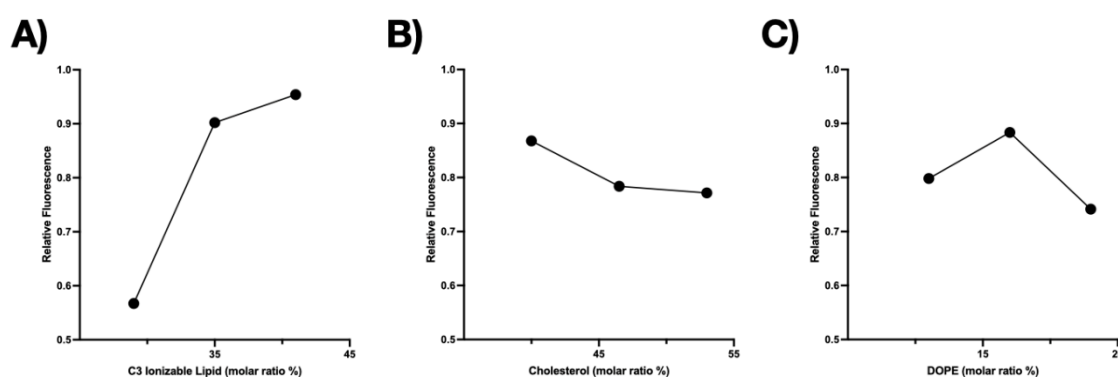

89  
90 **Fig. S7** | Impact trend curves generated during design-of-experiments investigation for C3  
91 ionizable lipid, DOPE, and cholesterol, respectively, on *in vitro* LNP-mediated mRNA transfection  
92 efficacy in Neuro-2A cells.

93  
94  
95  
96  
97

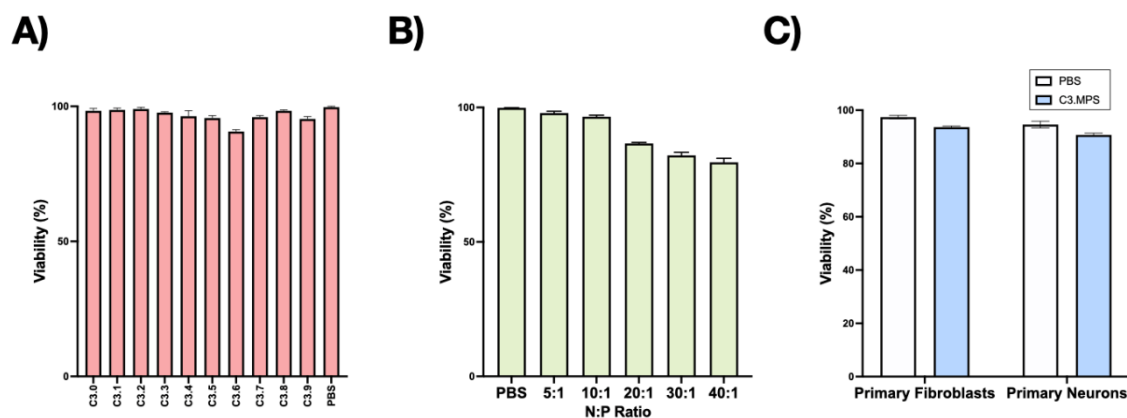

98  
99 **Fig. S8** | Viability after treatment by C3 LNPs (200 ng of mRNA) with different excipient ratios  
100 (A) or different N:P ratios (B) in Neuro-2A cells and after treatment by C3.MPS LNPs (200 ng of  
101 total mRNA) in primary fibroblasts / primary neurons isolated from an *IDUA*-W392X mouse (C)

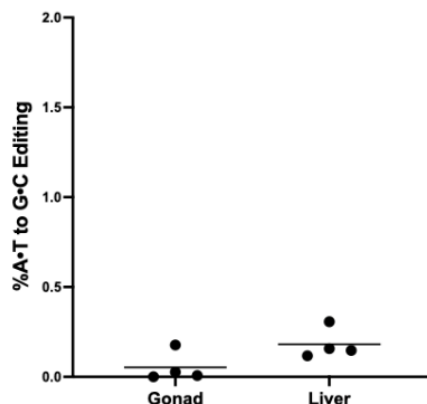

102  
 103 **Fig. S9** | Next-generation sequencing data of DNA isolated from the liver and gonadal tissue of  
 104 C3.MPS LNP treated *Idua*-W392X neonates at the target G→A *Idua* site, normalized to data  
 105 collected from PBS-injected negative control animals.  
 106  
 107  
 108  
 109  
 110  
 111  
 112  
 113  
 114

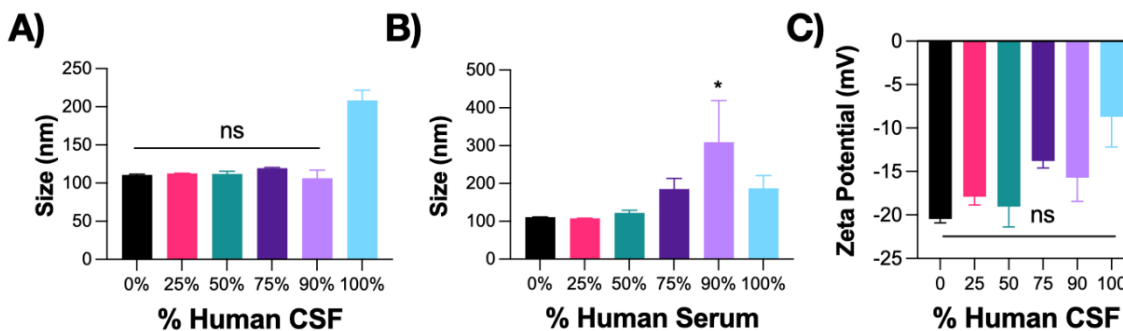

115  
 116 **Fig. S10** | Size and PDI measurements of C3.MPS LNPs incubated in either human cerebrospinal  
 117 fluid (A) or human serum (B) at increasing volume percentages of biological fluid, along with zeta  
 118 potential measurement of C3.MPS LNPs incubated in increasing volume percentages of human  
 119 cerebrospinal fluid (C). \*\*\*\*  $p < 0.0001$  by one-way ANOVA with post-hoc Dunnett's test  
 120 compared to positive control (0%).
